# Supplementary material for: Crystal melting and glass formation in copper thiocyanate based coordination polymers
Source: Royal Society of Chemistry journal article supplement (doi:10.1039/c9cc02172h), 2019-01-01
Supplement: c9cc02172h1.pdf [file c9cc02172h1.pdf]

*Supplementary Information for*

**Crystal Melting and Glass Formation in Copper Thiocyanate  
based Coordination Polymers**

Sanjog S. Nagarkar,<sup>a</sup> Haruna Kurasho,<sup>b</sup> Nghia Tuan Duong,<sup>c</sup> Yusuke Nishiyama,<sup>\*c,d</sup>  
Susumu Kitagawa,<sup>e</sup> and Satoshi Horike<sup>\*a,b,e,f</sup>

<sup>a</sup>AIST-Kyoto University Chemical Energy Materials Open Innovation Laboratory (ChEM-OIL), National Institute of Advanced Industrial Science and Technology (AIST), Yoshida-Honmachi, Sakyo-ku, Kyoto 606-8501, Japan

<sup>b</sup>Department of Synthetic Chemistry and Biological Chemistry, Graduate School of Engineering, Kyoto University, Katsura, Nishikyo-ku, Kyoto 615-8510, Japan

<sup>c</sup>NMR Science and Development Division, RIKEN SPring-8 Center and Nano-Crystallography Unit, RIKEN-JEOL Collaboration Center, Tsurumi, Yokohama, Kanagawa 230-0045, Japan

<sup>d</sup>JEOL RESONANCE Inc., 3-1-2 Musashino, Akishima, Tokyo 196-8558, Japan

<sup>e</sup>Institute for Integrated Cell-Material Sciences, Institute for Advanced Study, Kyoto University, Yoshida-Honmachi, Sakyo-ku, Kyoto 606-8501, Japan

<sup>f</sup>Department of Materials Science and Engineering, School of Molecular Science and Engineering, Vidyasirimedhi Institute of Science and Technology, Rayong 21210, Thailand

## Experimental section

**Materials.** All reagents and chemicals were obtained from commercial sources, of reagent grade, and used without further purification. These ligands were newly synthesized according to the modified literature procedures.<sup>1-4</sup>

ESI-MS spectra were recorded on a Thermo Fisher Scientific EXACTIVE spectrometer. FT-IR were measured using a Nicolet ID5 ATR operating at ambient temperature between 4000 to 500  $\text{cm}^{-1}$ .

**Liquid state NMR:**  $^1\text{H}$  NMR spectra were obtained using JNM-ECS400 and JNM-ECZ500R spectrometers operating at 400 and 500 MHz, respectively.  $^{13}\text{C}$  NMR spectra were obtained using JNM-ECS400 and JNM-ECZ500R spectrometers operating at 101 and 126 MHz, respectively.

**Single crystal X-ray diffraction:** Single crystal X-ray diffraction measurements were performed using a Rigaku AFC10 diffractometer with Rigaku Saturn Kappa CCD system equipped with a MicroMax-007 HF / VariMax rotating-anode X-ray generator with confocal monochromated  $\text{MoK}\alpha$  radiation. The structures were solved by a direct method (SHELXS-97) and refined by full-matrix least-squares procedures on  $F^2$  for all reflections (SHELXL-97). The hydrogen atoms were positioned geometry and refined using a riding model. OLEX2 software was used to generate publication materials.<sup>5</sup>

**X-ray powder diffraction (XRPD):** XRPD patterns were collected on a Rigaku RINT 2000 Ultima diffractometer with  $\text{CuK}\alpha$  radiation. Variable temperature XRPD were recorded at Spring-8 synchrotron facility Japan, BL02B2 beamline on powder samples with heating rate of 10  $^\circ\text{C min}^{-1}$  in temperature range RT to 200  $^\circ\text{C}$ .

**Thermal property measurements:** Thermogravimetric analysis (TGA) was performed using a Rigaku Thermo plus TG 8120 apparatus in the temperature range between 25  $^\circ\text{C}$  and 500  $^\circ\text{C}$  in a  $\text{N}_2$  atmosphere and at a heating rate of 10  $^\circ\text{C min}^{-1}$ . The differential scanning calorimetry (DSC) was carried out with Hitachi High-Tech Science Corporation model DSC7020 at the heating rate of 10  $^\circ\text{C min}^{-1}$  under a  $\text{N}_2$  atmosphere using a sealed aluminum pan. The melting points and glass transition temperature was determined by using a software TA7000 Standard Analysis (Ver. 5.0).

**X-ray absorption spectroscopy (XAS):** The sample were prepared by mixing with appropriate amounts of boron nitride (BN) and pressed in to pellet. X-ray absorption spectra were collected at the Aichi Synchrotron Radiation Center (Aichi SR) on beamlines BL5S1. The data was processed using the IFEFFIT library.<sup>6</sup> Fourier transformation was  $k^3$ -weighted in the  $k$  range from 3-14  $\text{\AA}^{-1}$ . Cu foil internal energy

calibration was measured simultaneously with each sample. The energy was defined by assigning the first inflection point of the Cu foil spectrum to 8980.168 eV.

**Solid state NMR:** All the NMR experiments were carried out at ambient temperature (~25 °C) on a 600 MHz NMR spectrometer (JEOL JNM-ECZ600R) equipped with a 1 mm double resonance ultrafast MAS probe (JEOL RESONANCE Inc., Japan) at a magnetic field of 14.1 T. Approximately 1 mg of **1** and **1<sub>g</sub>** are packed separately in zirconia rotors and MAS rate was set to 70 kHz. <sup>1</sup>H/<sup>13</sup>C correlation spectra were measured by <sup>1</sup>H detected CP-HSQC experiments (Fig. S7a).<sup>7</sup> While a long contact time of 2 ms is used for the first CP transfer to maximize the <sup>13</sup>C magnetization, contact times of the second CP were reduced to 0.5-1 ms to selectively observe covalently <sup>1</sup>H-<sup>13</sup>C pair. Thus no signal of quaternary carbons was observed. 10 kHz WALTZ heteronuclear decouplings were employed both for <sup>1</sup>H and <sup>13</sup>C decouplings during *t*<sub>2</sub> and *t*<sub>1</sub> evolution time, respectively. <sup>1</sup>H double quantum (DQ) / single quantum (SQ) correlation spectra were observed with BABA-xy16 DQ recoupling sequences (Fig. S7b).<sup>8</sup> <sup>1</sup>H-<sup>63</sup>Cu RESPDOR<sup>9</sup> build up curve is observed with SR4 <sup>1</sup>H-<sup>63</sup>Cu heteronuclear dipolar recoupling sequence,<sup>10</sup> irradiated on the <sup>1</sup>H channel. The <sup>63</sup>Cu magnetization was saturated by rotor synchronized phase-modulated saturation pulse<sup>11</sup> on the <sup>63</sup>Cu channel. The saturation pulse length of 657 μs was used.

## Synthesis:

### Ligands

**Preparation of 4-ethyl-4, 4'-bipyridyl thiocyanate (C<sub>2</sub>bpySCN):**<sup>1</sup> 4,4'-bipyridine (9.00 g, 57.6 mmol) and bromoethane (4.28 ml, 57.7 mmol) were dissolved in acetonitrile (200 mL). The resulting solution was refluxed for 20 h and then evaporated. The crude product (13.1 g, 86%) and KSCN (4.78 g, 2.53 mmol) were dissolved in acetonitrile (250 mL). The resulting solution was stirred at 50 °C for 24 h and the formed precipitate was filtered and discarded. The filtrate was evaporated in vacuo and then C<sub>2</sub>bpySCN was obtained as pale yellow powder (9.62 g, 69%). <sup>1</sup>H NMR (400 MHz, DMSO-D<sub>6</sub>) δ 9.24 (d, J = 7.1 Hz, 2H), 8.86 (dd, J = 4.4, 1.6 Hz, 2H), 8.63 (d, J = 7.0 Hz, 2H), 8.03 (dd, J = 4.4, 1.6 Hz, 2H), 4.66 (q, J = 7.3 Hz, 2H), 1.58 ppm (t, J = 7.3 Hz, 3H); <sup>13</sup>C NMR (101 MHz, DMSO-D<sub>6</sub>) δ 152.75, 151.53, 145.67, 141.44, 130.07, 125.92, 122.46, 56.59, 16.85 ppm; IR (KBr) ν = 3025, 2051, 1644, 1600, 1549, 1531, 1497, 1470, 1440, 1412, 1362, 1227, 1184, 1092, 1080, 878, 870, 819, 737, 725, 706, 590, 561 cm<sup>-1</sup>; HRMS-ESI (m/z): calcd for [M-SCN]<sup>+</sup> (C<sub>12</sub>H<sub>13</sub>N<sub>2</sub>), 185.1073; found, 185.1069.

**Preparation of 4-butyl-4, 4'-bipyridyl thiocyanate (C<sub>4</sub>bpySCN):**<sup>2</sup> This compound was prepared in 61% yield as pale yellow powder from the reaction of 4,4'-bipyridine, 1-bromobutane and KSCN according to a procedure similar to that described for C<sub>2</sub>bpySCN. <sup>1</sup>H NMR (400 MHz, DMSO-D<sub>6</sub>) δ 9.24 (d, J = 7.0 Hz, 2H), 8.85 (dd, J = 4.6, 1.6 Hz, 2H), 8.63 (d, J = 6.8 Hz, 2H), 8.04 (dd, J = 4.5, 1.7 Hz, 2H), 4.64 (t, J = 7.4 Hz, 2H), 1.90-1.97 (m, 2H), 1.32 (td, J = 15.0, 7.4 Hz, 2H), 0.92 ppm (t, J = 7.4 Hz, 3H); <sup>13</sup>C NMR (101 MHz, DMSO-D<sub>6</sub>) δ 152.24, 150.98, 145.29, 140.87, 129.53, 125.41, 121.93, 60.18, 32.64, 18.80, 13.35 ppm; IR (KBr) ν = 3028, 2957, 2053, 1644, 1548, 1532, 1464, 1412, 1226, 1181, 815, 751, 735, 718, 593, 566 cm<sup>-1</sup>; ESI-MS: m/z = 213.1380 [C<sub>14</sub>H<sub>17</sub>N<sub>2</sub><sup>+</sup>], 57.9743 [SCN<sup>-</sup>]. HRMS-ESI (m/z): calcd for [M-SCN]<sup>+</sup> (C<sub>14</sub>H<sub>17</sub>N<sub>2</sub>), 213.1386; found, 213.1380.

**Preparation of Zincke salt:** This compound was synthesized according to the literature.<sup>3</sup> 4,4'-bipyridine (7.01 g, 44.9 mmol) and 2,4-dinitrochlorobenzene (6.05 g, 29.9 mmol) were dissolved in acetone (50 mL). The solution was refluxed for 13 h, during which time a pale gray precipitate formed. The precipitate was collected by filtration and washed several times with dichloromethane. The product was dried in vacuo to yield Zincke salt as a gray powder (7.14 g, 74%). <sup>1</sup>H NMR (500 MHz, D<sub>2</sub>O) δ 9.25 (d, J = 2.4 Hz, 1H), 9.10 (d, J = 6.7 Hz, 2H), 8.79 (dd, J = 8.5, 2.4 Hz, 1H), 8.69 (dd, J = 4.6, 1.5 Hz, 2H), 8.54 (d, J = 6.7 Hz, 2H), 8.12 (d, J = 8.5 Hz, 1H), 7.88 ppm (dd, J = 4.7, 1.7 Hz, 2H).

**Preparation of 4-phenyl-4,4'-bipyridyl thiocyanate (PhbpySCN):**<sup>4</sup> Zincke salt (1.44 g, 4.0 mmol) was dissolved with aniline (460  $\mu$ L, 5.0 mmol) in ethanol (12 mL). The resulting solution was refluxed for 24 h and the formed precipitate was filtered and discarded. The filtrate was evaporated in vacuo and the crude product was refluxed with acetone (300 mL) for 2 h, filtered, and dried in vacuo to yield PhbpyCl as a very pale green powder (0.73 g, 55%). PhbpyCl (0.35 g, 1.3 mmol) and KSCN (0.13 g, 1.3 mmol) were dissolved in acetonitrile (100 mL). The resulting solution was stirred at 50 °C for 24 h and the formed precipitate was filtered and discarded. The filtrate was evaporated in vacuo and then PhbpySCN was obtained as yellow powder (0.30 g, 44%). <sup>1</sup>HNMR (400 MHz, DMSO-D6)  $\delta$  9.51 (dt, J = 7.2, 1.9 Hz, 2H), 8.90 (dd, J = 4.5, 1.7 Hz, 2H), 8.79 (dt, J = 7.1, 1.8 Hz, 2H), 8.15 (dd, J = 4.6, 1.6 Hz, 2H), 7.92-7.95 (m, 2H), 7.77 ppm (dd, J = 5.3, 1.8 Hz, 3H); <sup>13</sup>CNMR (126 MHz, DMSO-D6)  $\delta$  153.18, 151.10, 145.42, 142.31, 140.56, 131.31, 130.20, 129.50, 125.27, 124.77, 122.08 ppm; IR (KBr)  $\nu$  = 3025, 2050, 1633, 1590, 1537, 1489, 1445, 1405, 1235, 1221, 870, 862, 847, 815, 761, 739, 720, 706, 688, 614, 574  $\text{cm}^{-1}$ ; HRMS-ESI (m/z): calcd for [M-SCN]<sup>+</sup> (C<sub>16</sub>H<sub>13</sub>N<sub>2</sub>), 233.1067; found 233.1067.

**Preparation of 3,1':4',4''-Terpyridinium thiocyanate (3-pybpySCN):** This compound was newly prepared in 41% yield as a brown powder from the reaction of Zincke salt, 3-aminopyridine and KSCN according to a procedure similar to that described for PhbpySCN. <sup>1</sup>HNMR (400 MHz, DMSO-D6)  $\delta$  9.57 (d, J = 7.0 Hz, 2H), 9.13 (d, J = 2.6 Hz, 1H), 8.90-8.93 (m, 3H), 8.86 (d, J = 7.0 Hz, 2H), 8.42 (dq, J = 8.3, 1.4 Hz, 1H), 8.17 (dd, J = 4.4, 1.6 Hz, 2H), 7.83 ppm (dd, J = 8.2, 4.8 Hz, 1H); <sup>13</sup>CNMR (126 MHz, DMSO-D6)  $\delta$  153.64, 152.00, 151.13, 145.72, 145.54, 140.47, 138.95, 132.99, 129.51, 125.27, 124.54, 122.10 ppm; IR (KBr)  $\nu$  = 3036, 2055, 1639, 1597, 1532, 1480, 1457, 1428, 1412, 1322, 1273, 1228, 1196, 1067, 1025, 1006, 993, 868, 853, 824, 805, 738, 728, 721, 707, 667, 630, 612, 576  $\text{cm}^{-1}$ ; HRMS-ESI (m/z): calcd for [M-SCN]<sup>+</sup> (C<sub>15</sub>H<sub>12</sub>N<sub>3</sub>), 234.1026; found, 234.1020.

### **Coordination polymers**

**Synthesis of  $[\text{Cu}_2(\text{SCN})_3(\text{C}_2\text{bpy})]$  (1),  $[\text{Cu}_2(\text{SCN})_3(\text{C}_4\text{bpy})]$  (2) and  $[\text{Cu}_8(\text{SCN})_{12}(\text{Phbpy})_4]$  (3):** Copper (I) thiocyanate (CuSCN, 109 mg, 0.89 mmol) and  $\text{C}_2\text{bpySCN}$  (109 mg, 0.45 mmol) were added to THF (50 mL) in a 110 mL vessel. After the vessel was sealed, it was heated at 90 °C for 48 h. Crystalline powder samples thus produced were washed with THF (30 mL  $\times$  3) and the solvent was removed under vacuum at 70 °C. The same procedure was applied for **2** and **3**, using  $\text{C}_4\text{bpySCN}$  (122 mg, 0.45 mmol) and  $\text{PhbpySCN}$  (131 mg, 0.45 mmol) respectively instead of  $\text{C}_2\text{bpySCN}$ .

### **Syntheses of $[\text{Cu}(\text{SCN})_2(3\text{-pybpy})]$ (4):**

CuSCN (12 mg, 0.10 mmol), 3-pybpySCN (58 mg, 0.20 mmol), and KSCN (9.7 mg, 0.10 mmol) were added to THF (2 mL) in a 4 mL glass vessel. After the vessel was sealed, it was heated at 90 °C for 48 h. Crystalline powder samples thus produced were washed with THF (30 mL  $\times$  3) and the solvent was removed under vacuum at 70 °C.

CCDC reference numbers for CPs are 1899561 (**1**); 1899562 (**2**); 1899563 (**3**) and - 1899564 (**4**).

**Figures and Tables:**

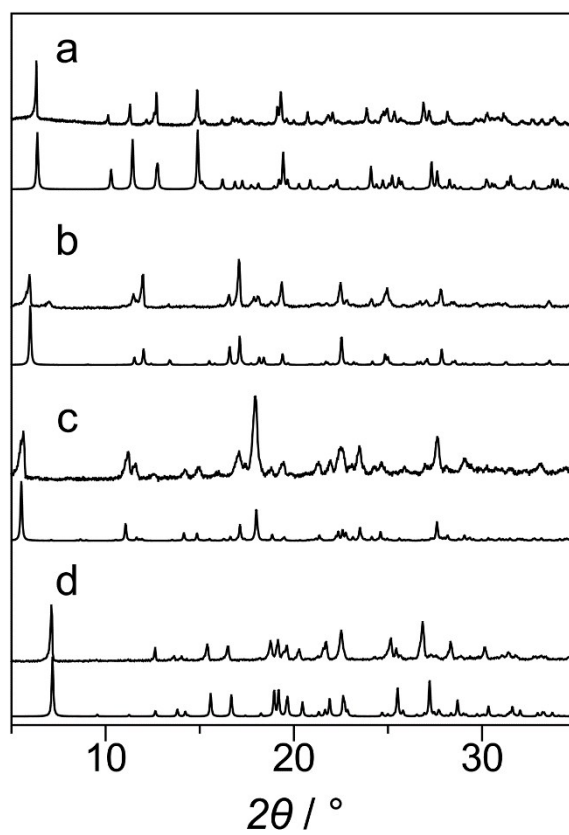

**Figure S1.** Simulated and As-synthesized X-ray Powder diffraction (XRPD) profiles of (a) **1**, (b) **2**, (c) **3** and (d) **4**.

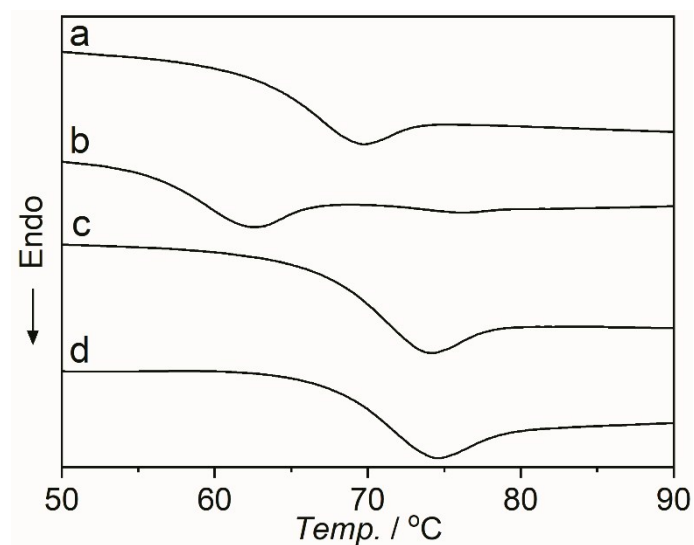

**Figure S2.** Second differential scanning calorimetry (DSC) heating up-scans of (a) **1**, (b) **2**, (c) **3** and (d) **4** under the N<sub>2</sub> atmosphere with heating rate of 10 °C min<sup>-1</sup>.

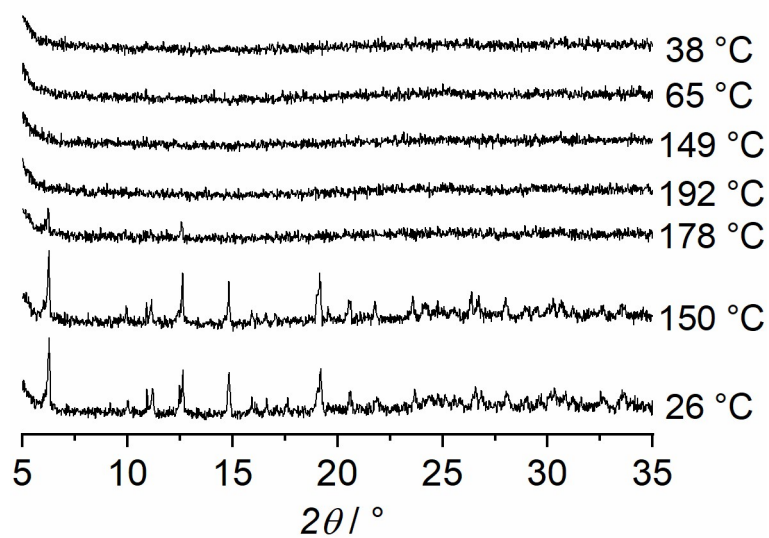

**Figure S3.** Variable temperature X-ray powder diffraction (XRPD) profiles of **1**. Sample was heated from 26 (from bottom) to 192 °C, and cooled to 38 °C (upper).



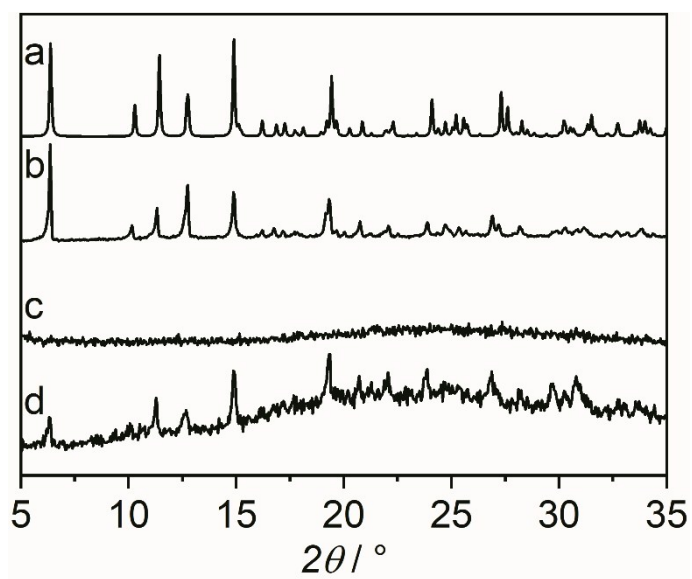

**Figure S4.** X-ray powder diffraction (XRPD) profiles of (a) Simulated (b) **1**, (c) **1<sub>g</sub>** and (d) **1<sub>r</sub>**.

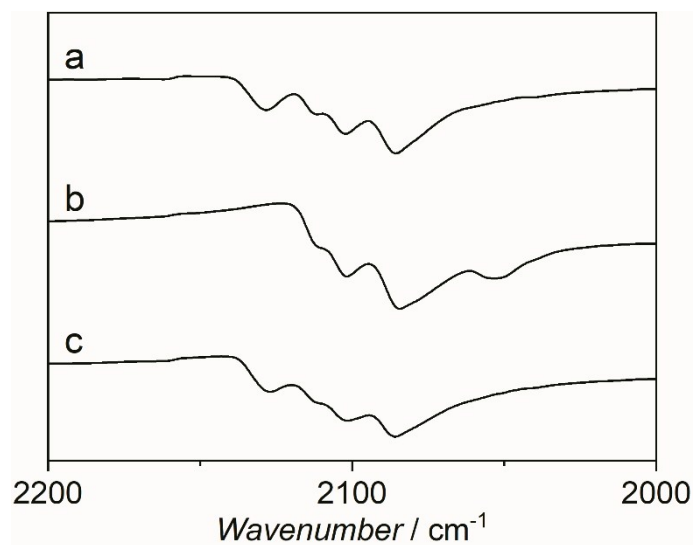

**Figure S5.** FT-IR spectra of (a) **1**, (b) **1<sub>g</sub>** and (c) **1<sub>r</sub>**.

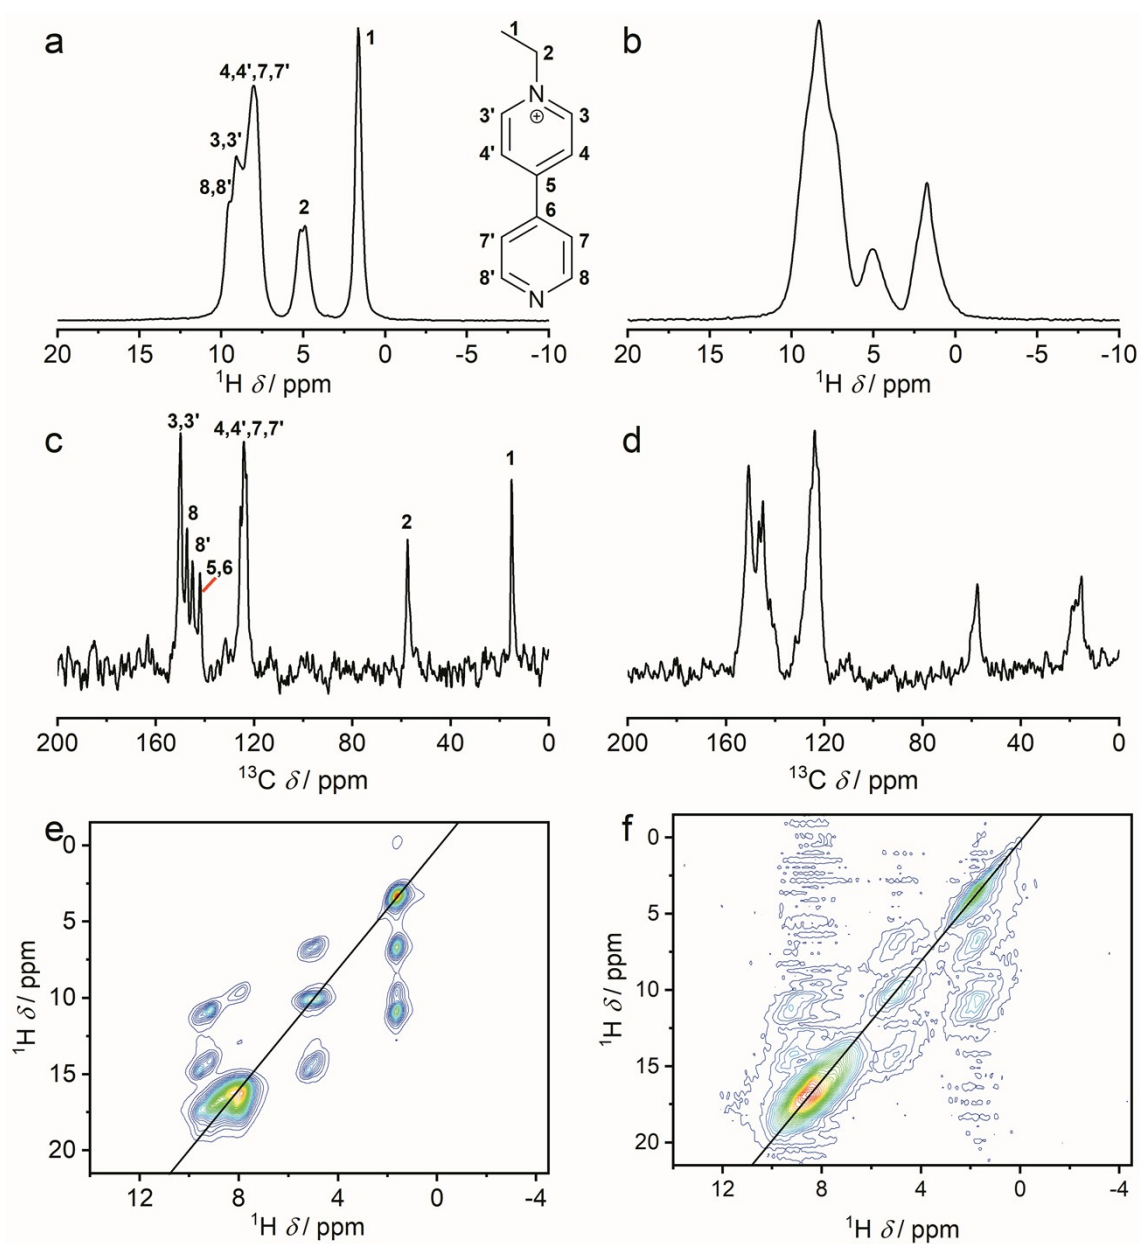

**Figure S6.** (a, b)  $^1\text{H}$  spin echo, (c, d)  $^{13}\text{C}$  CPMAS, and (e, f) 2D  $^1\text{H}$  DQ/SQ correlation solid-state NMR spectra of **1** and **1<sub>g</sub>**.

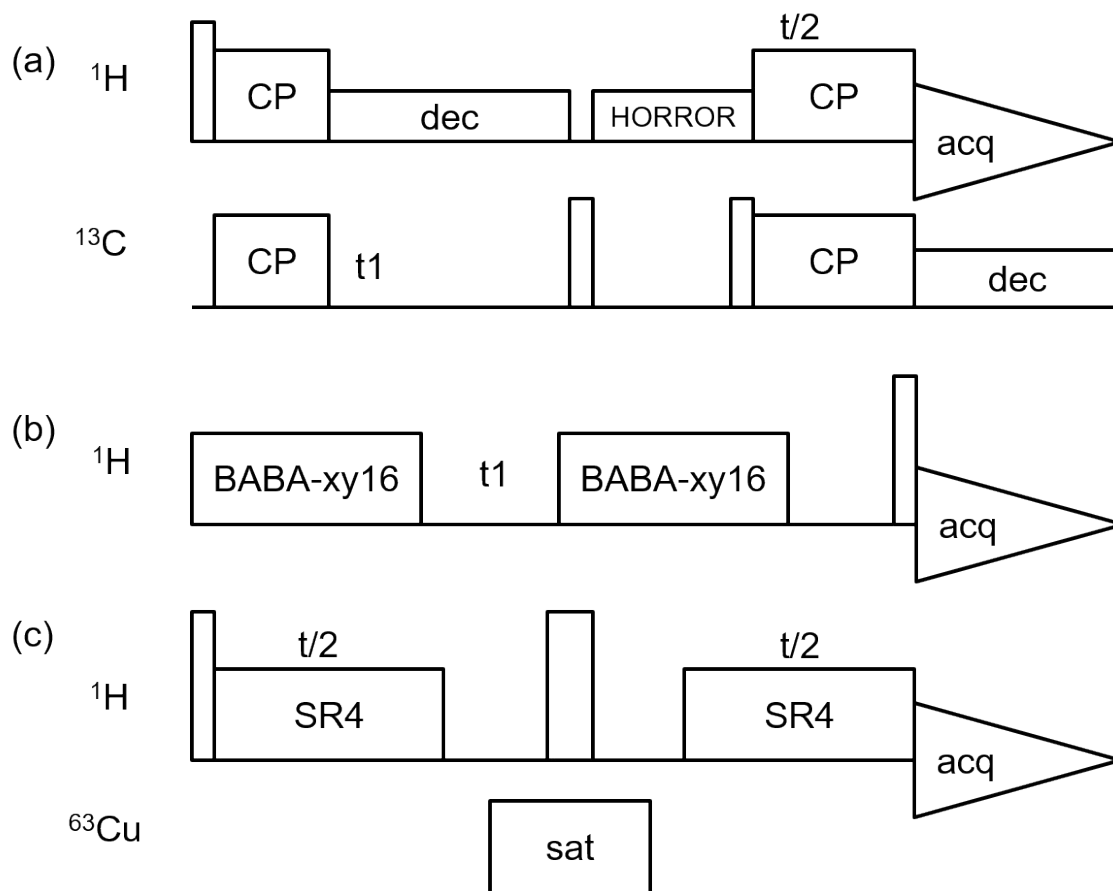

**Figure S7.** Pulse sequences used for (a)  $^1\text{H}/^{13}\text{C}$  correlation, (b)  $^1\text{H}$  DQ/SQ correlation and (c)  $^1\text{H}$ - $^{63}\text{Cu}$  RESPDOR experiments.

**Table S1.** Melting temperature ( $T_m$ ), Glass transition ( $T_g$ ), Enthalpy ( $\Delta H_m$ ) and Entropy ( $\Delta S_m$ ) of melting for CPs determined by DSC. Heating rates are  $10\text{ }^\circ\text{C min}^{-1}$ .

| Entry    | $T_m / ^\circ\text{C}$ | $T_g / ^\circ\text{C}$ | $\Delta H_f / \text{kJ mol}^{-1}$ | $\Delta S_f / \text{J mol}^{-1} \text{K}^{-1}$ |
|----------|------------------------|------------------------|-----------------------------------|------------------------------------------------|
| <b>1</b> | 187                    | 68                     | 40                                | 87                                             |
| <b>2</b> | 138                    | 59                     | 32                                | 75                                             |
| <b>3</b> | 224                    | 71                     | 50                                | 100                                            |
| <b>4</b> | 203                    | 72                     | 55                                | 116                                            |

**Table S2.**  $^1\text{H } T_1$  relaxation time of **1** and **1<sub>g</sub>**. Saturation recovery method was used.

|                      | Aromatic <sup>a</sup>                    | Methylene | Methyl |
|----------------------|------------------------------------------|-----------|--------|
| <b>1</b>             | 6.3 s                                    | 5.1 s     | 4.2 s  |
| <b>1<sub>g</sub></b> | 5.3 s (monoexp.)<br>11 s, 0.9 s (biexp.) | 4.8 s     | 2.8 s  |

<sup>a</sup> While the mono-exponential function fits well with the recovery curve of **1**, mono-exponential function gives poor fitting for **1<sub>g</sub>**. For better fitting, bi-exponential fitting was also applied on **1<sub>g</sub>**.

**Table S3.**  $^1\text{H } T_2$  relaxation time of **1** and **1<sub>g</sub>**. Spin echo method was used.

|                      | Aromatic    | Methylene | Methyl |
|----------------------|-------------|-----------|--------|
| <b>1</b>             | 1.3 – 1.8 s | 1.3 s     | 2.5 s  |
| <b>1<sub>g</sub></b> | 2 – 2.4 s   | 1.5 s     | 2.8 s  |

## References

1. M. Bonchio, M. Carraro, G. Casella, V. Causin, F. Rastrelli and G. Saielli, *Phys. Chem. Chem. Phys.*, 2012, **14**, 2710.
2. A. Abebe, S. Admassie, I. J. Villar-Garcia and Y. Chebude, *Inorg. Chem. Commun.*, 2013, **29**, 210.
3. M. Christl, *Angew. Chem., Int. Ed.*, 2007, **46**, 9152.
4. F. Lin, T.-Y. Zhou, T.-G. Zhan and X. Zhao, *Tetrahedron*, 2014, **70**, 2251.
5. O. V. Dolomanov, L. J. Bourhis, R. J. Gildea, J. A. K. Howard and H. Puschmann, *J. Appl. Crystallogr.*, 2009, **42**, 339.
6. B. Ravel and M. Newville, *J. Synchrotron Rad.*, 2005, **12**, 537.
7. Y. Ishii and R. Tycko, *J. Magn. Reson.*, 2000, **142**, 199; Y. Nishiyama, *Solid State Nucl. Magn. Reson.*, 2016, **78**, 24.
8. K. Saalwächter, F. Lange, K. Matyjaszewski, C.-F. Huang and R. Graf, *J. Magn. Reson.*, 2011, **212**, 204.
9. Z. Gan, *Chem. Commun.*, 2006, 4712.
10. A. Brinkmann and A. P. M. Kentgens, *J. Am. Chem. Soc.*, 2006, **128**, 14758; L. Chen, X. Lu, Q. Wang, O. Lafon, J. Trébosc, F. Deng and J.-P. Amoureux, *J. Magn. Reson.*, 2010, **206**, 269.
11. E. Nimerovsky, R. Gupta, J. Yehl, M. Li, T. Polenova and A. Goldbourt, *J. Magn. Reson.*, 2014, **244**, 107.
